# Supplementary material for: Designing CoS2-Mo2C and CoS2-W2C hybrids for high-performance supercapacitors and hydrogen evolution reactions
Source: Royal Society of Chemistry journal article supplement (doi:10.1039/d4qi00759j), 2024-01-01
Supplement: d4qi00759j1.pdf [file d4qi00759j1.pdf]

## Supporting Information

### Designing CoS<sub>2</sub>-Mo<sub>2</sub>C and CoS<sub>2</sub>-W<sub>2</sub>C hybrids for high-performance supercapacitors and hydrogen evolution reactions

Sajjad Hussain<sup>a,b</sup>, Sikandar Aftab<sup>c</sup>, Zeesham Abbas<sup>a,b</sup>, Iftikhar Hussain<sup>d</sup>, Shoyebmohamad F. Shaikh<sup>e</sup>, K. Karuppasamy<sup>f,g</sup>, Hyun-Seok Kim<sup>h</sup>, Jongwan Jung<sup>a,b</sup>, Dhanasekaran Vikraman<sup>h\*</sup>

<sup>a</sup> Hybrid Materials Center (HMC), Sejong University, Seoul 05006, Republic of Korea.

<sup>b</sup> Department of Nanotechnology and Advanced Materials Engineering, Sejong University, Seoul 05006, Republic of Korea.

<sup>c</sup> Department of Intelligent Mechatronics Engineering, Sejong University, Seoul 05006, South Korea

<sup>d</sup> Department of Mechanical Engineering, City University of Hong Kong, 83 Tat Chee Avenue, Kowloon, Hong Kong

<sup>e</sup> Department of Chemistry, College of Science, King Saud University, P.O. Box 2455, Riyadh 11451, Saudi Arabia

<sup>f</sup> Department of Chemical and Petroleum Engineering, Khalifa University of Science and Technology, Abu Dhabi, 127788, United Arab Emirates

<sup>g</sup> Emirates Nuclear Technology Center (ENTC), Khalifa University of Science and Technology, Abu Dhabi, 127788, United Arab Emirates

<sup>h</sup> Division of Electronics and Electrical Engineering, Dongguk University-Seoul, Seoul 04620, Republic of Korea.

\* Corresponding author's Email: [v.j.dhanasekaran@gmail.com](mailto:v.j.dhanasekaran@gmail.com)

## S1. Characterization

Field emission scanning electron microscopy (FESEM) images and energy-dispersive X-ray spectroscopy (EDX) mapping images were obtained using (HITACHI S-4700), 5 kV. The Raman spectroscopy measurements were accomplished using Renishaw Invia RE04, Ar laser - 512 nm at room temperature. The structural properties were characterized by Rigaku X-ray diffractometer with Cu-K $\alpha$  radiation (0.154 nm) at 40 kV and 40 mA in the scanning range of 10-80° (2 $\theta$ ). X-ray powder diffraction (XRD) was conducted with Cu-K $\alpha$  radiation (0.154 nm) at 40 kV and 40 mA in the scanning range of 5-80° (2 $\theta$ ). The XPS measurements were performed using an Ulvac PHI X-tool spectrometer with Al K $\alpha$  X-ray radiation (1486.6 eV). The atomic structures were characterized by a JEOL-2010F transmission electron microscopy with an accelerating voltage of 200 keV. 3Flex surface characterization analyzer for nitrogen adsorption and desorption measurement at 77 K (Micromeritics, USA).

The HER potential values were converted for reversible hydrogen electrode (RHE) by the given formula:  $E(\text{RHE})_{\text{Ag/AgCl}} = E(\text{vs Ag/AgCl}) + E^0_{(\text{Ag/AgCl})} + 0.0592 \times \text{pH}$  for acidic medium and  $E(\text{RHE})_{\text{HgO}} = E(\text{vs Hg/HgO}) + E^0_{(\text{Hg/HgO})} + 0.0592 \times \text{pH}$  for KOH medium.

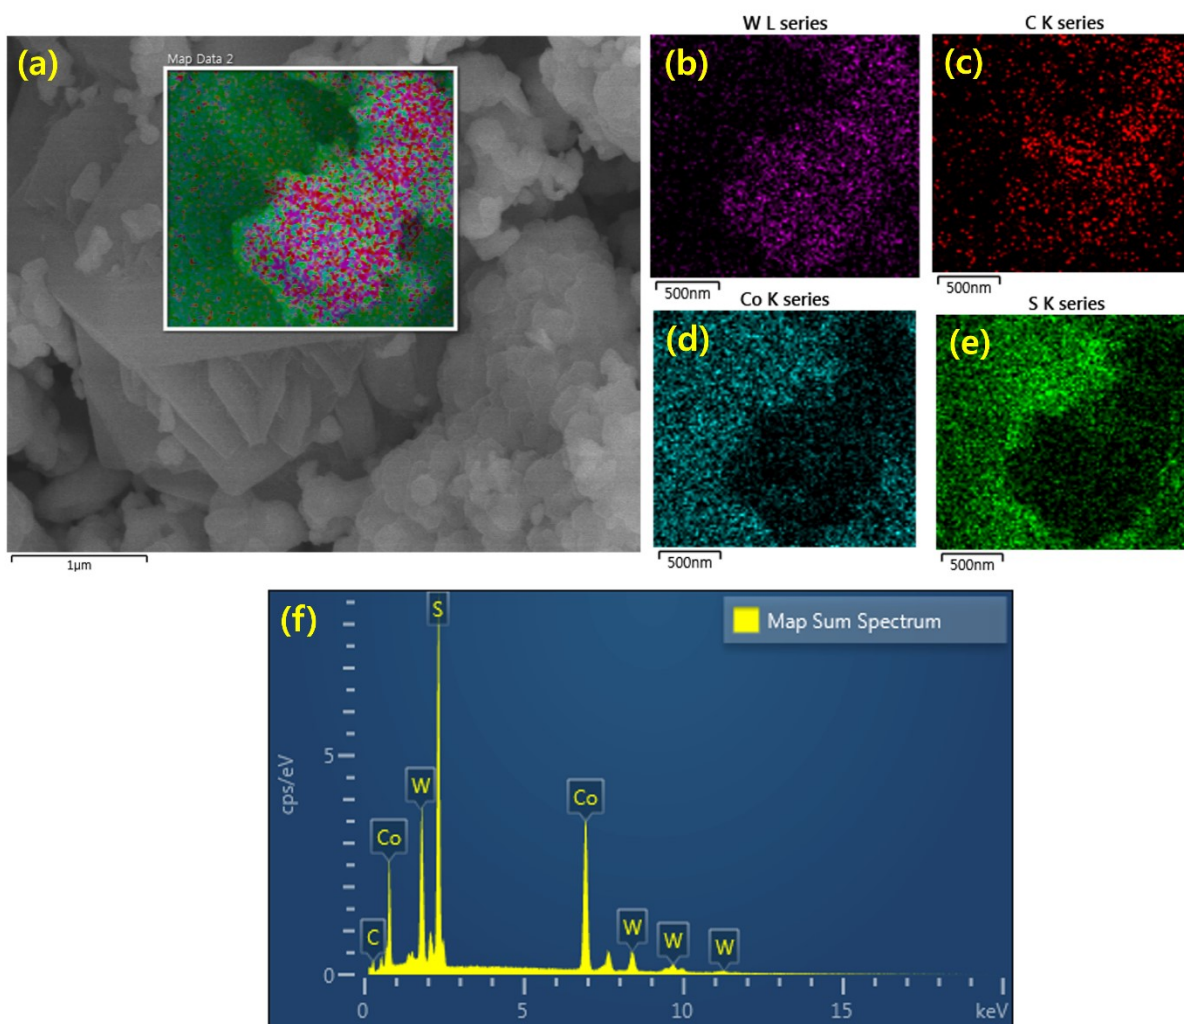

**Figure S1.** (a) FESEM elemental mapping and (b) W, (c) C, (d) Co and (e) S elements, (f) EDS profile for the  $\text{CoS}_2\text{-W}_2\text{C}$  hybrids.

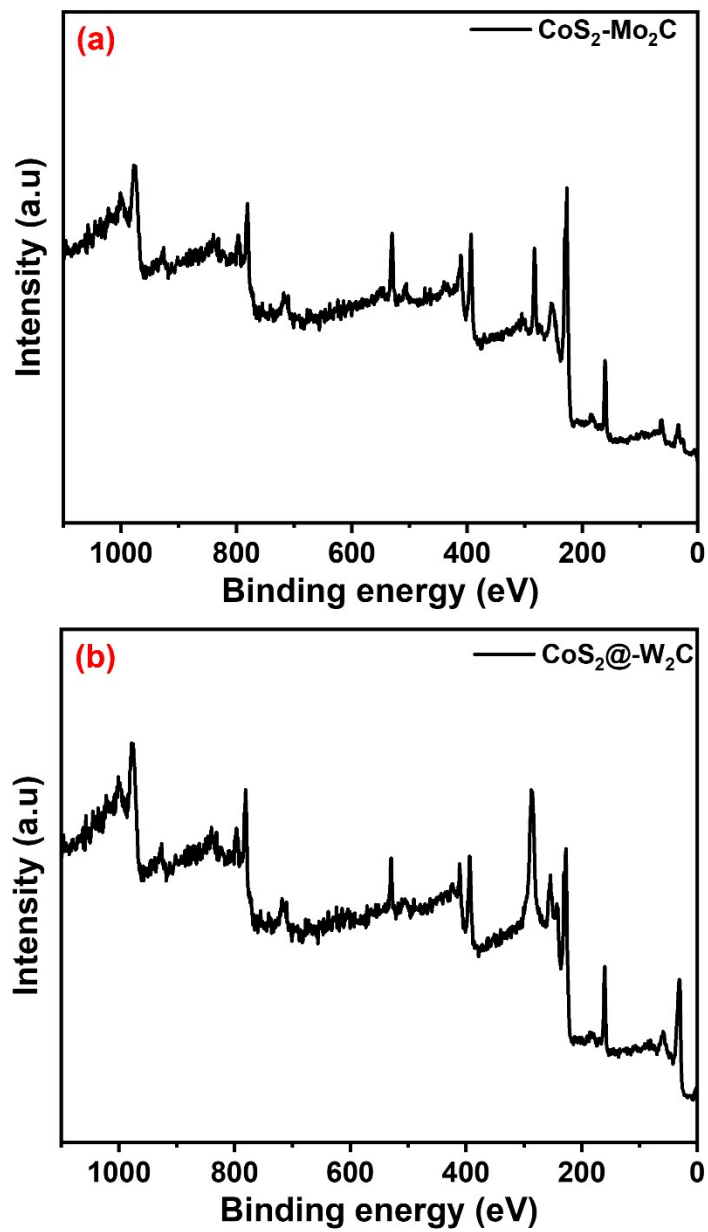

**Figure S2.** XPS survey spectra for (a) CoS<sub>2</sub>-Mo<sub>2</sub>C and (b) CoS<sub>2</sub>-W<sub>2</sub>C hybrids.

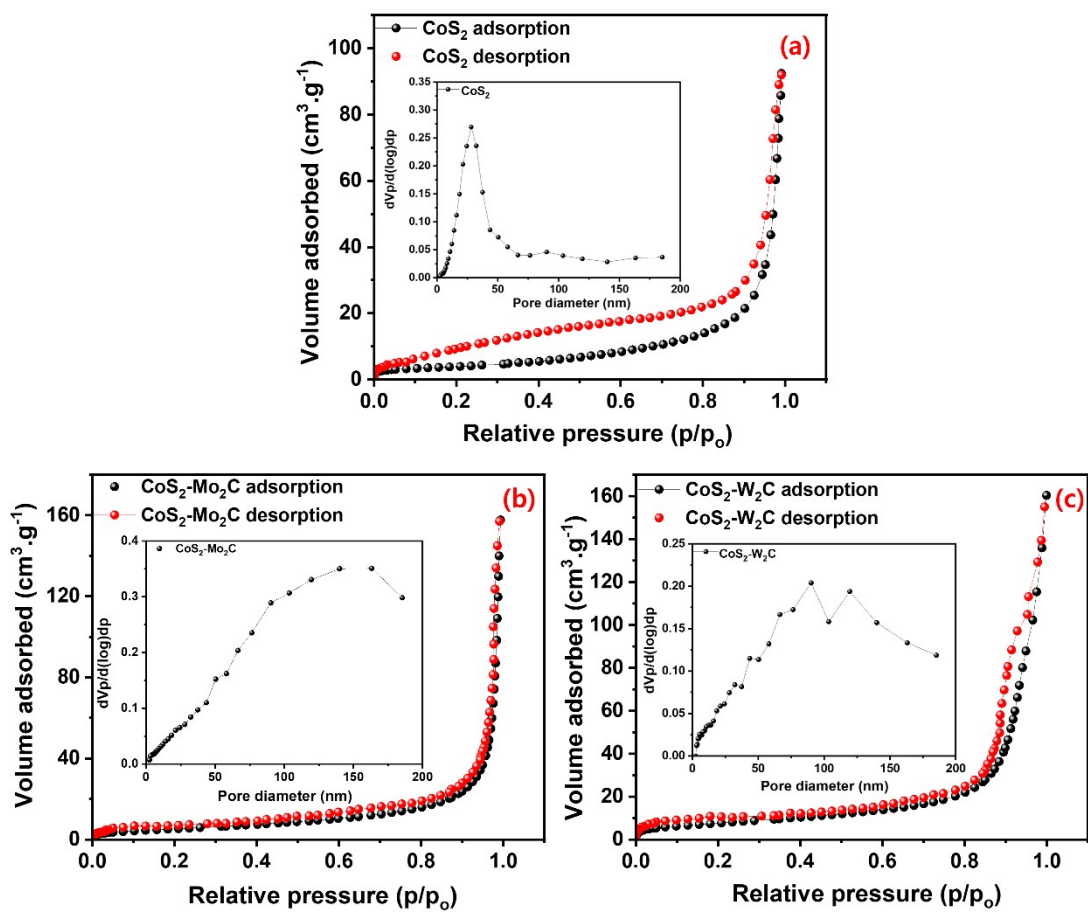

**Figure S3.** (a-c) BET isotherms curves for (c)  $\text{CoS}_2$ , (d)  $\text{CoS}_2\text{-Mo}_2\text{C}$  and (e)  $\text{CoS}_2\text{-W}_2\text{C}$  hybrid nanocomposites (Inset: BJH profiles).

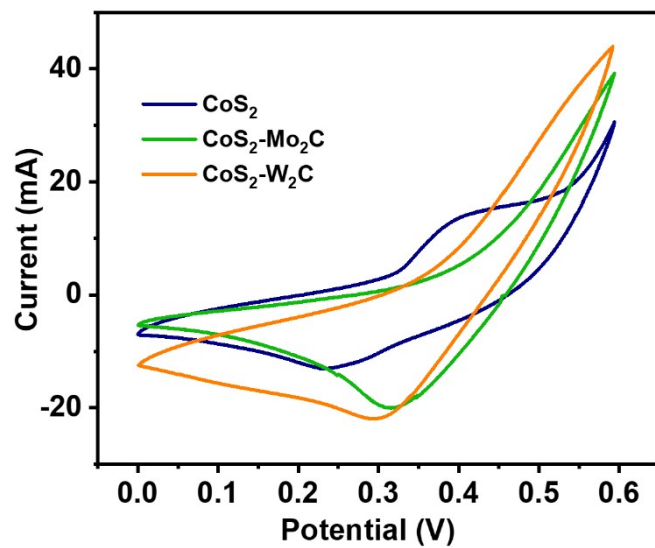

**Figure S4.** CVs at 100 mV/s for CoS<sub>2</sub>, CoS<sub>2</sub>-W<sub>2</sub>C and CoS<sub>2</sub>-Mo<sub>2</sub>C electrodes

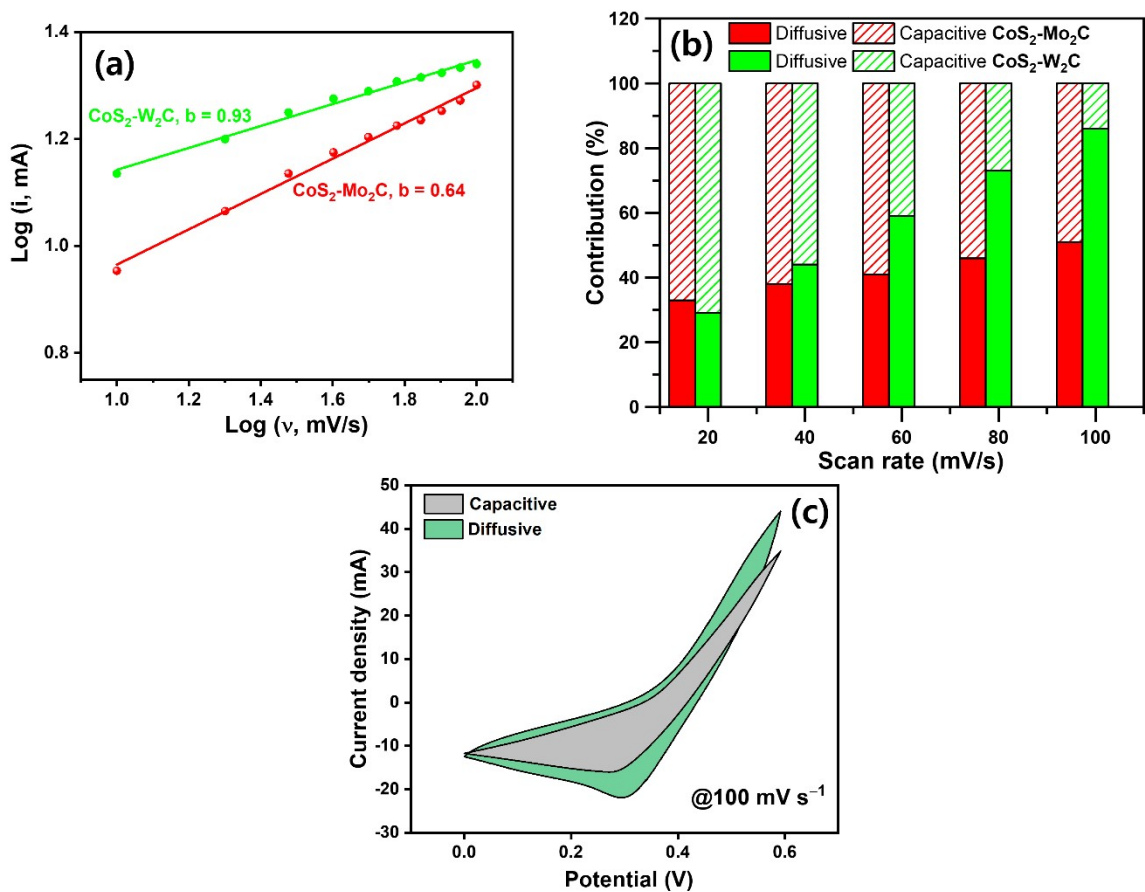

**Figure S5.** (a) Logarithmic relationship between peak current and scan rates for the hybrid electrodes; (b) Capacitive and diffusive process contribution percentage at different scan rates for hybrid electrodes; (c) Capacitive and diffusion contribution curves for  $\text{CoS}_2\text{-W}_2\text{C}$  hybrid electrode at  $100 \text{ mV/s}$ .

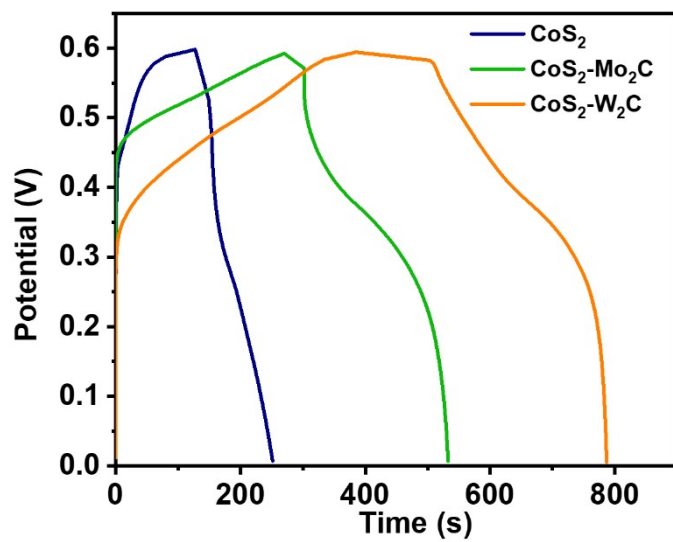

**Figure S6.** GCDs at 2 A/g for  $\text{CoS}_2$ ,  $\text{CoS}_2\text{-W}_2\text{C}$  and  $\text{CoS}_2\text{-Mo}_2\text{C}$  electrodes



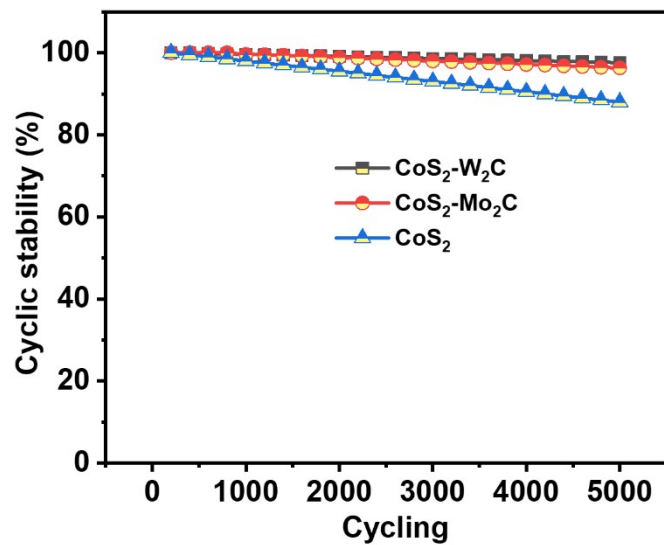

**Figure S7.** Cycling stability of CoS<sub>2</sub>, CoS<sub>2</sub>-W<sub>2</sub>C and CoS<sub>2</sub>-Mo<sub>2</sub>C by half-cell

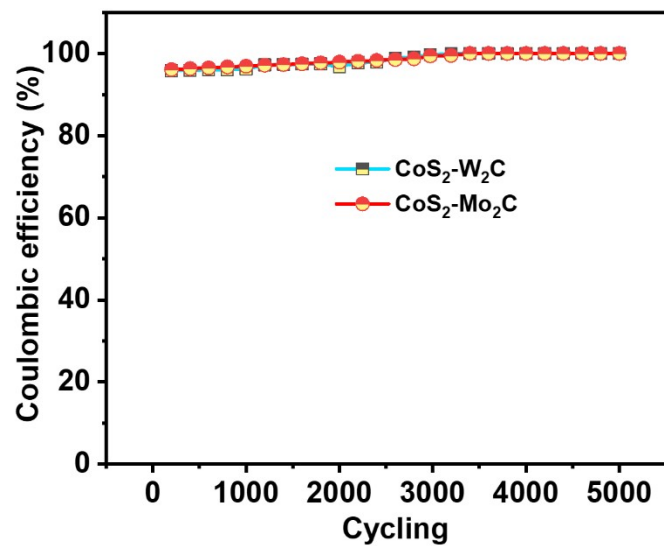

**Figure S8.** Coulombic efficiency of CoS<sub>2</sub>-W<sub>2</sub>C and CoS<sub>2</sub>-Mo<sub>2</sub>C hybrid

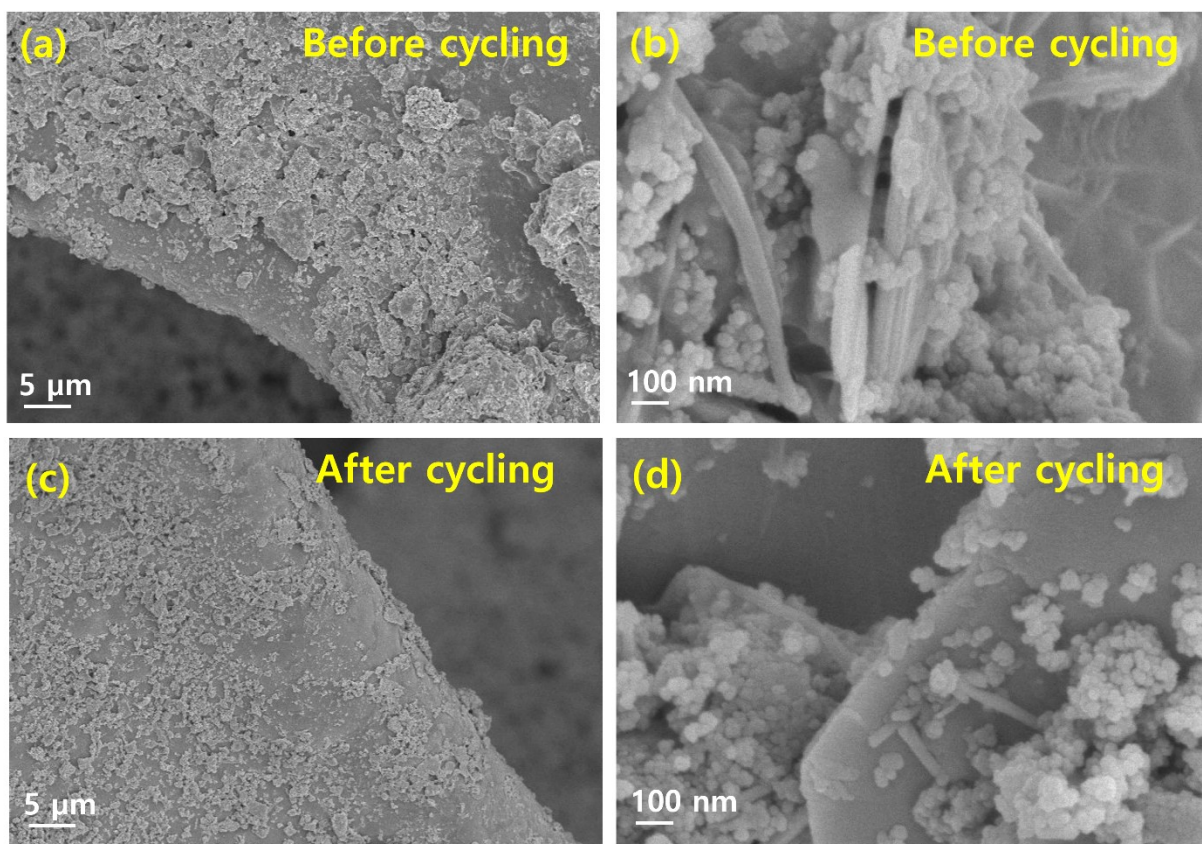

**Figure S9.** FESEM images (a-b) before and (c-d) after cycling of  $\text{CoS}_2\text{-W}_2\text{C}$  coated NF supercapacitor electrode

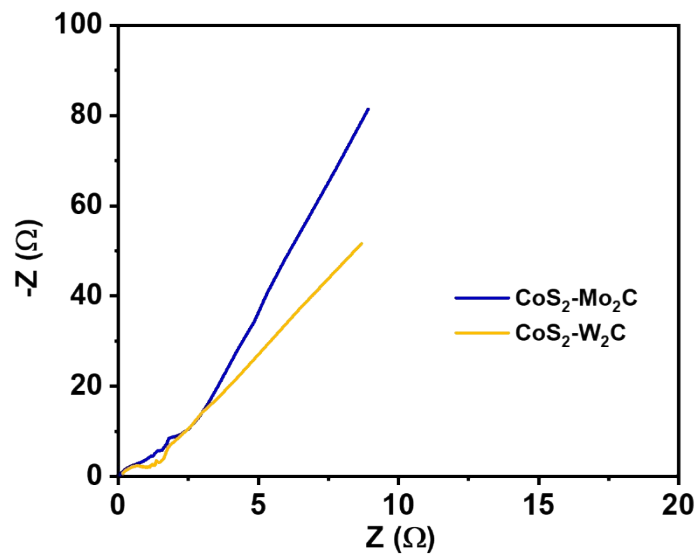

**Figure S10.** EIS profiles  $\text{CoS}_2\text{-W}_2\text{C}$  and  $\text{CoS}_2\text{-Mo}_2\text{C}$  ASC devices

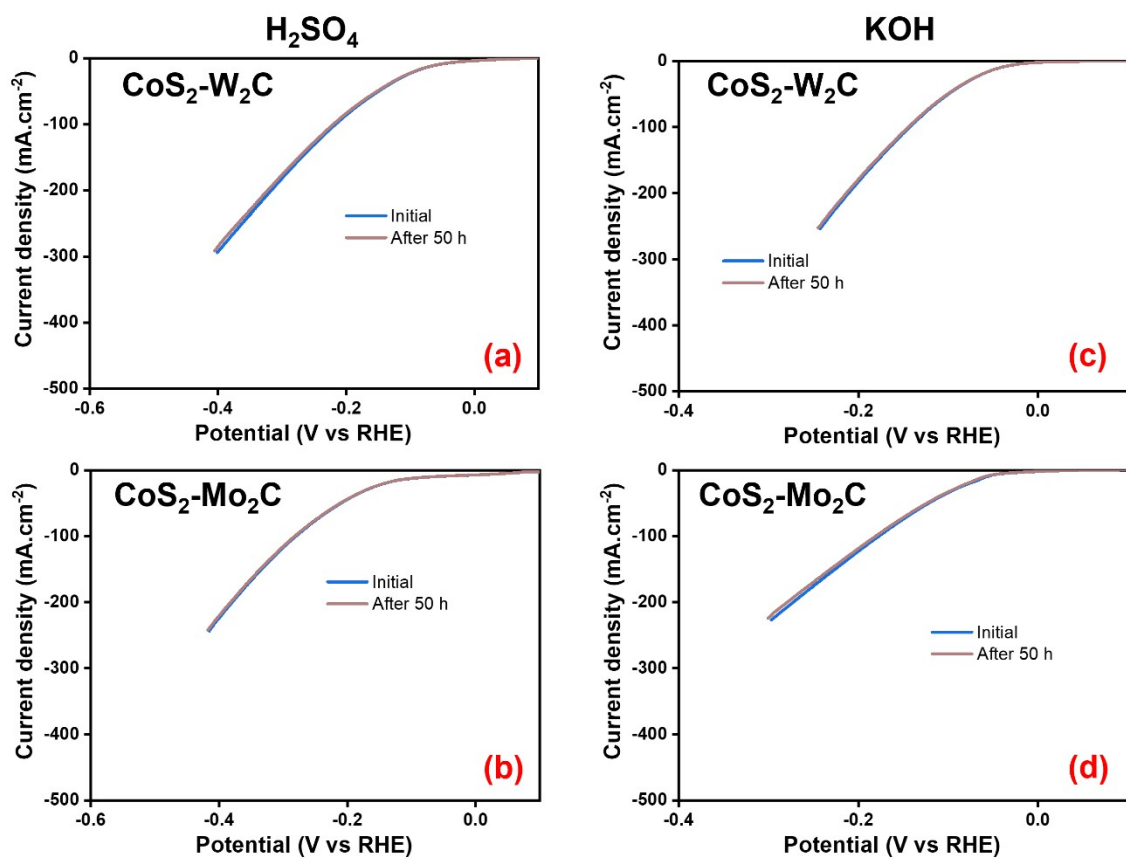

**Figure S11.** LSV profiles (a,c) CoS<sub>2</sub>-W<sub>2</sub>C and (b,d) CoS<sub>2</sub>-Mo<sub>2</sub>C under acid and KOH environment.

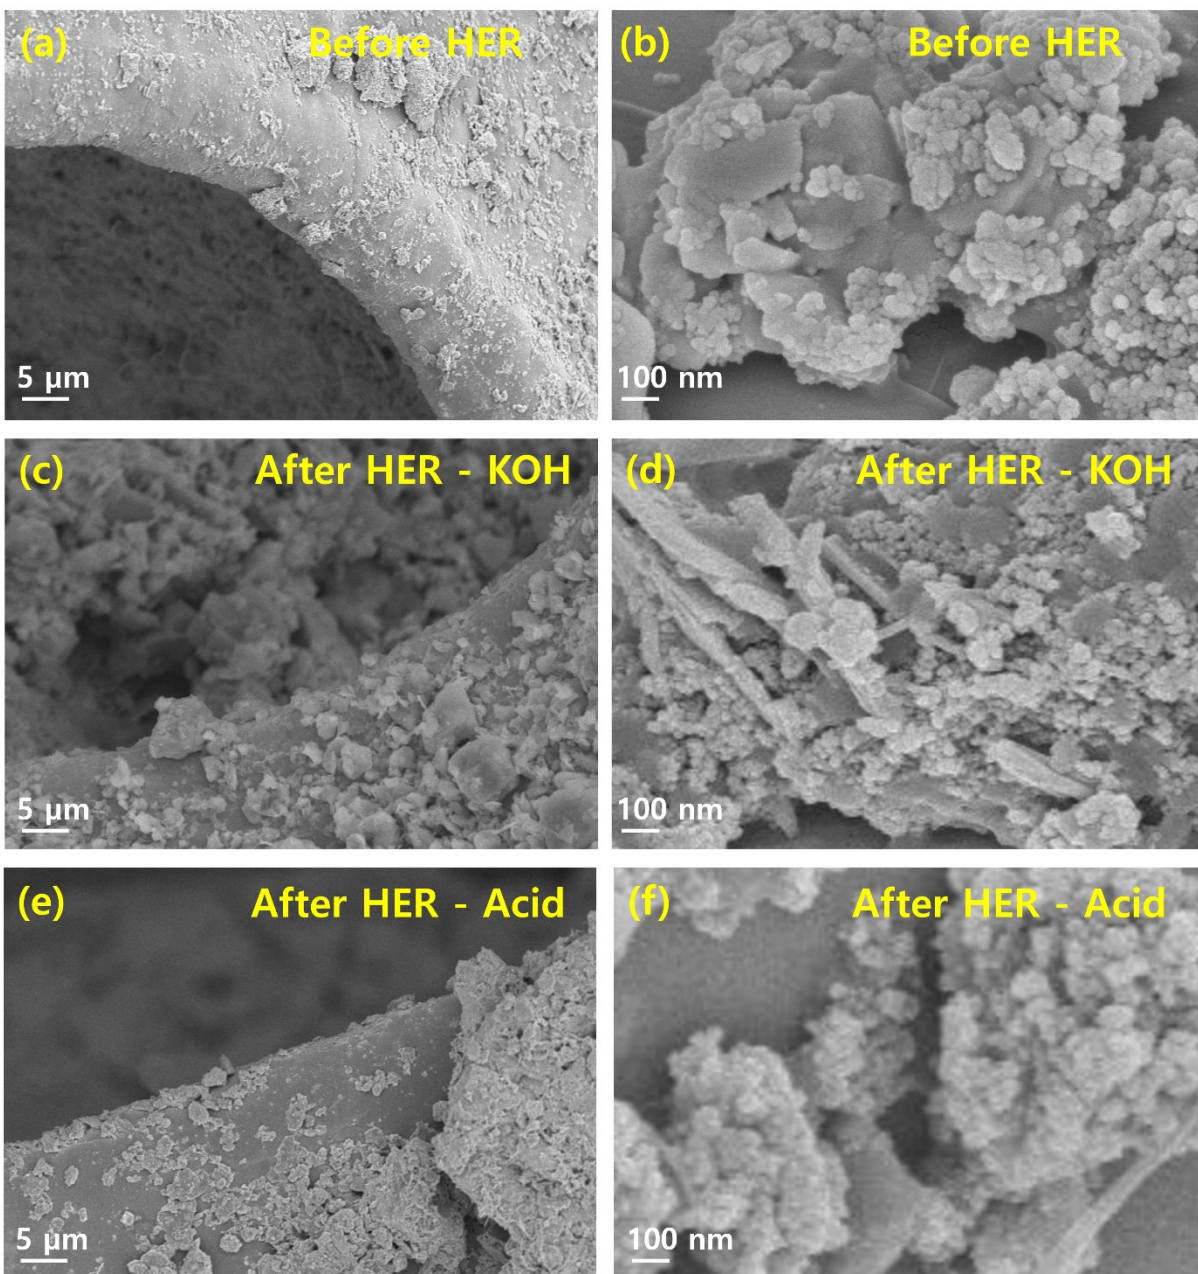

**Figure S12.** FESEM images (a-b) before HER and after HER in (c-d) KOH and (e-f) acid environment for  $\text{CoS}_2\text{-W}_2\text{C}$  electrocatalyst coated NF.

**Table S1.** Half-cell supercapacitor performances of TMDs and TMCs based electrodes

| Electrode materials                                       | Electrolyte                              | Specific capacitance / capacity                    | Energy density | Power density | Capacitance retention (%) / cycles | Ref.             |
|-----------------------------------------------------------|------------------------------------------|----------------------------------------------------|----------------|---------------|------------------------------------|------------------|
| <i>CoS<sub>2</sub>-W<sub>2</sub>C</i>                     | <i>3 M KOH</i>                           | <i>720 C/g at 2 A/g</i>                            | -              | -             | <i>97/5000</i>                     | <i>This work</i> |
| 3D graphene/<br>MoS <sub>2</sub> composite                | 1.0 M<br>Na <sub>2</sub> SO <sub>4</sub> | 410 F·g <sup>-1</sup> @ 1<br>A·g <sup>-1</sup>     | -              | -             | 80.3/10000                         | 1                |
| Mo <sub>2</sub> C/MoS <sub>2</sub> hybrid                 | 1 M KOH                                  | 1040 F·g <sup>-1</sup> @<br>0.5 A·g <sup>-1</sup>  | -              | -             | 94/5000                            | 2                |
| W <sub>2</sub> C/MoS <sub>2</sub> hybrid                  | 1 M KOH                                  | 681 F·g <sup>-1</sup> @ 0.5<br>A·g <sup>-1</sup>   | -              | -             | 90/5000                            | 2                |
| WS <sub>2</sub> /RGO hybrids                              | 1.0 M<br>Na <sub>2</sub> SO <sub>4</sub> | 350 F/g@<br>2mV/s                                  | ~49<br>Wh/kg   | -             | -                                  | 3                |
| WS <sub>2</sub> @MXene/GO                                 | 1 KOH                                    | 1111 F·g <sup>-1</sup> @ 2<br>A·g <sup>-1</sup>    | -              | -             | 97.15/5000                         | 4                |
| 3D graphene-MoS <sub>2</sub><br>hybrid                    | 1.0 M KOH                                | 169.3 F/g                                          | 28.43<br>Wh/Kg | 10.18<br>W/kg | -                                  | 5                |
| MoSe <sub>2</sub> -Mo <sub>2</sub> C<br>hybrid nanoarrays | 1 M KOH                                  | 850 F·g <sup>-1</sup> @ 2.5<br>A·g <sup>-1</sup>   | -              | -             | 98/10000                           | 6                |
| Mo <sub>2</sub> C/NCF                                     | 6.0 M KOH                                | 1250 F·g <sup>-1</sup> @ 1<br>A·g <sup>-1</sup>    | -              | -             | 100/500                            | 7                |
| MXene-NiCo <sub>2</sub> S <sub>4</sub> @<br>NF            | 3 M KOH                                  | 1147.47 F·g <sup>-1</sup> @<br>1 A·g <sup>-1</sup> | -              | -             | 80.4/3000                          | 8                |
| MoS <sub>2</sub> /CNS                                     | 1 M<br>Na <sub>2</sub> SO <sub>4</sub>   | 108 F g <sup>-1</sup> @ 1 A<br>g <sup>-1</sup>     | 74<br>Wh/kg    | 3700<br>W/Kg  | -                                  | 9                |
| MoS <sub>2</sub> /MXene<br>nanohybrid                     | 3 M KOH                                  | 583 F·g <sup>-1</sup> @<br>1 A·g <sup>-1</sup>     | -              | -             | 82.5/3000                          | 10               |
| MoS <sub>2</sub> /MWCNT                                   | 1 M<br>Na <sub>2</sub> SO <sub>4</sub>   | 452.7 F g <sup>-1</sup> @ 1<br>A g <sup>-1</sup>   | -              | -             | 95.8/ 1000                         | 11               |
| NiCo <sub>2</sub> S <sub>4</sub> -g-MoS <sub>2</sub>      | 1.0 M KOH                                | 1270 F g <sup>-1</sup> @1 A<br>g <sup>-1</sup>     | -              | -             | 94.8/4000                          | 12               |
| MoS <sub>2</sub> -graphene                                | 1.0 M KOH                                | 756 F·g <sup>-1</sup> @<br>0.5 A·g <sup>-1</sup>   | 6<br>Wh/Kg     | 125<br>W/kg   | 88/10000                           | 13               |

**Table S2.** Asymmetric supercapacitors performances of TMDs and TMCs based electrodes

| Electrode materials                                               | Specific capacitance                              | Energy density            | Power density            | Capacitance retention (%) / cycles | Ref.             |
|-------------------------------------------------------------------|---------------------------------------------------|---------------------------|--------------------------|------------------------------------|------------------|
| <i>CoS<sub>2</sub>-W<sub>2</sub>C</i>                             | <i>423 F/g at 2 A/g</i>                           | <i>150 Wh/Kg</i>          | <i>4.5 kW/Kg</i>         | <i>94.1/5000</i>                   | <i>This work</i> |
| MXene/MoSe <sub>2</sub>                                           | 350 F·g <sup>-1</sup> @ 1 A·g <sup>-1</sup>       | 48 Wh/Kg                  | 500 W/kg                 | 93/5000                            | 14               |
| MXene-NiCo <sub>2</sub> S <sub>4</sub> @NF                        | -                                                 | 27.24 Wh/Kg               | 0.48 kW/kg               | -                                  | 8                |
| MXene/CuS                                                         | 49.3 F·g <sup>-1</sup> @ 0.5 A·g <sup>-1</sup>    | 15.4 Wh/Kg                | 750.2 W/kg               | 82.4/5000                          | 15               |
| 1T-MoS <sub>2</sub> / MXene                                       | 386.7F·g <sup>-1</sup> @ 1 A·g <sup>-1</sup>      | -                         | -                        | 91.1/20000                         | 16               |
| MXene/NiCo <sub>2</sub> S <sub>4</sub>                            | 621F·g <sup>-1</sup> @ 1 A·g <sup>-1</sup>        | 72.82 Wh/Kg               | 0.635k W/Kg              | 90.88/20000                        | 17               |
| 1T-VS <sub>2</sub> /MXene Hybrid                                  | 115.7 F·g <sup>-1</sup> @ 0.8 A·g <sup>-1</sup>   | 41.13 Wh/Kg               | 793.50 W/kg              | 85/5000                            | 18               |
| Cu <sub>0.5</sub> Co <sub>0.5</sub> Se <sub>2</sub> //MXene       | 321 F·g <sup>-1</sup> @ 1 A·g <sup>-1</sup>       | 84.19 Wh/Kg               | 715.12 W/kg              | 91.1/10000                         | 19               |
| MXene-MoO <sub>2</sub>                                            | 3 F cm <sup>-3</sup> @ 2 mV s <sup>-1</sup>       | 9.7 mW h cm <sup>-3</sup> | 0.198 W cm <sup>-3</sup> | 88/10000                           | 20               |
| NiMoO <sub>4</sub> /Ti <sub>3</sub> C <sub>2</sub> T <sub>x</sub> | 137.3 F·g <sup>-1</sup> @ 0.5 A·g <sup>-1</sup>   | 33.36 Wh/Kg               | 400.08 W/kg              | 72.6/10000                         | 21               |
| Ti <sub>3</sub> C <sub>2</sub> /Ni-Co-Al-LDH                      | 128.89 F·g <sup>-1</sup> @ 0.5 A·g <sup>-1</sup>  | 23.6 Wh/Kg                | 6.93 kW/kg               | 97.8/10000                         | 22               |
| NiCoS/d-Ti <sub>3</sub> C <sub>2</sub>                            | 95.2 F·g <sup>-1</sup> @ 0.5 A·g <sup>-1</sup>    | 22.6 Wh/Kg                | 0.4 kW/kg                | 91.2/10000                         | 23               |
| graphene/MXene hydrogel                                           | 226.7 F·g <sup>-1</sup> @ 1 A·g <sup>-1</sup>     | 9.3 Wh/Kg                 | 500 W/kg                 | -                                  | 24               |
| NiCo <sub>2</sub> -LDHs@MXene/rGO                                 | 240 F·g <sup>-1</sup> @ 0.5 A·g <sup>-1</sup>     | 65.3 Wh/Kg                | 700 W/kg                 | 92.8/10000                         | 25               |
| MXene/MoSe <sub>2</sub> /ASC                                      | 156.3 F·g <sup>-1</sup> @ 0.5 A·g <sup>-1</sup>   | 55.6 Wh/Kg                | 800.3 W/kg               | 94.1/5000                          | 26               |
| V <sub>2</sub> NT <sub>x</sub> MXene                              | 112.8 F·g <sup>-1</sup> @ 1.85 mA/cm <sup>2</sup> | 15.66 Wh/Kg               | 3748.4 W/kg              | 96/10000                           | 27               |
| MXene@Ni-Mn LDH                                                   | 56 F·g <sup>-1</sup> @ 1 A·g <sup>-1</sup>        | 44.7 Wh/Kg                | 800 W/kg                 | 90.3/5000                          | 28               |
| Ni-S/d-Ti <sub>3</sub> C <sub>2</sub> nanohybrid                  | 69.4 c·g <sup>-1</sup> @ 0.5 A·g <sup>-1</sup>    | 5.1 Wh/Kg                 | 10k W/kg                 | 71.4/10000                         | 29               |



|                                                                          |                                                                      |            |             |         |    |
|--------------------------------------------------------------------------|----------------------------------------------------------------------|------------|-------------|---------|----|
| $\text{Ni}_{1.5}\text{Co}_{1.5}\text{S}_4$<br>5@ $\text{Ti}_3\text{C}_2$ | 140 $\text{A}\cdot\text{g}^{-1}$ @ 1<br>$\text{A}\cdot\text{g}^{-1}$ | 49.8 Wh/Kg | 800<br>W/kg | 90/8000 | 30 |
|--------------------------------------------------------------------------|----------------------------------------------------------------------|------------|-------------|---------|----|

**Table S3.** HER catalytic performances TMDs and TMCs-based electrocatalysts

| Electrocatalyst                                                   | Electrolyte                                    | $\eta$ (mV)                         | Tafel Slope (mV $\cdot$ dec <sup>-1</sup> ) | $j_0$ (mA $\cdot$ cm <sup>-2</sup> ) | Ref              |
|-------------------------------------------------------------------|------------------------------------------------|-------------------------------------|---------------------------------------------|--------------------------------------|------------------|
| <b>CoS<sub>2</sub>-W<sub>2</sub>C</b>                             | <b>1 M KOH</b>                                 | <b>42</b>                           | <b>27</b>                                   | <b>1.35</b>                          | <b>This work</b> |
| <b>CoS<sub>2</sub>-W<sub>2</sub>C</b>                             | <b>0.5 M H<sub>2</sub>SO<sub>4</sub></b>       | <b>50</b>                           | <b>42</b>                                   | <b>1.2</b>                           |                  |
| Reduced GO-Mo <sub>2</sub> C composites                           | 0.5 M H <sub>2</sub> SO <sub>4</sub>           | 206 @ 10 mA/cm <sup>2</sup>         | 52                                          | -                                    | 31               |
| MoSe <sub>2</sub> /NiSe <sub>2</sub> composite nanowires          | 0.5 M H <sub>2</sub> SO <sub>4</sub>           | 249 @ 100 mA/cm <sup>2</sup>        | 46.9                                        | -                                    | 32               |
| MoO <sub>2</sub> / $\alpha$ -Mo <sub>2</sub> C heterojunction     | 0.5 M H <sub>2</sub> SO <sub>4</sub> & 1 M KOH | 152 & - 100 @ 10 mA/cm <sup>2</sup> | 65 & 50                                     | 4.42 $\times$ 10 <sup>-2</sup>       | 33               |
| Mo <sub>2</sub> C Nanoparticles                                   | 0.5 M H <sub>2</sub> SO <sub>4</sub> & 1 M KOH | 180 & 210 @ 10 mA/cm <sup>2</sup>   | 49 & 48                                     | 3 $\times$ 10 <sup>-3</sup>          | 34               |
| WS <sub>2</sub> /W <sub>2</sub> C heterostructure                 | 0.5 M H <sub>2</sub> SO <sub>4</sub>           | 126 @ 10 mA/cm <sup>2</sup>         | 68                                          | 0.501                                | 35               |
| MoSe <sub>2</sub> @MoS <sub>2</sub>                               | 0.5 M H <sub>2</sub> SO <sub>4</sub>           | 161 @ 10 mA/cm <sup>2</sup>         | 60                                          | -                                    | 36               |
| Mo <sub>2</sub> C/mesoporous carbon                               | 0.1 M KOH                                      | 165 @ 10 mA/cm <sup>2</sup>         | 63.3                                        | -                                    | 37               |
| Mo <sub>2</sub> C/ N doped carbon nanotubes                       | 0.5 M H <sub>2</sub> SO <sub>4</sub>           | 147 @ 10 mA/cm <sup>2</sup>         | 71                                          | 72.7 @ 200 mV                        | 38               |
| MoC-Mo <sub>2</sub> C Heteronanowires                             | 0.5 M H <sub>2</sub> SO <sub>4</sub> & 1 M KOH | 126 & 120 @ 10 mA/cm <sup>2</sup>   | 43 & 42                                     | 1.1 $\times$ 10 <sup>-2</sup>        | 39               |
| CoSe <sub>2</sub> /MoSe <sub>2</sub> heterostructures             | 1 M KOH                                        | 218 @ 10 mA/cm <sup>2</sup>         | 76                                          | -                                    | 40               |
| Mo <sub>2</sub> C/CNT                                             | 1.0 M HClO <sub>4</sub>                        | 64 @ 1 mA/cm <sup>2</sup>           | 52.2                                        | 1.4 $\times$ 10 <sup>-2</sup>        | 41               |
| MoSe <sub>2</sub> /Bi <sub>2</sub> Se <sub>3</sub> hybrids        | 0.5 M H <sub>2</sub> SO <sub>4</sub>           | 300 mV @ 85 mA/cm <sup>2</sup>      | 44                                          | -                                    | 42               |
| MoP/Mo <sub>2</sub> C@C                                           | 0.5 M H <sub>2</sub> SO <sub>4</sub>           | 89 @ 10 mA/cm <sup>2</sup>          | 45                                          | 0.215                                | 43               |
| Mo <sub>2</sub> C/MoS <sub>2</sub>                                | 0.5 M H <sub>2</sub> SO <sub>4</sub> & 1 M KOH | 93 & 98 @ 10 mA/cm <sup>2</sup>     | 67 & 68                                     | 0.952 & 1.32                         | 2                |
| MoSSe Nanoflake                                                   | 0.5 M H <sub>2</sub> SO <sub>4</sub>           | 164 @ 10 mA/cm <sup>2</sup>         | 48                                          | -                                    | 44               |
| MoSSe@rGO composite                                               | 0.5 M H <sub>2</sub> SO <sub>4</sub>           | 135 @ 5 mA/cm <sup>2</sup>          | 51                                          | -                                    | 45               |
| Mo <sub>2</sub> C Nanoparticles/ N doped porous carbon nanofibers | 0.5 M H <sub>2</sub> SO <sub>4</sub> & 1 M KOH | 85 & 90 @ 1 mA/cm <sup>2</sup>      | 68 & 60.2                                   | 0.178                                | 46               |
| Mo <sub>2</sub> C/Graphene Nanoribbons                            | 0.5 M H <sub>2</sub> SO <sub>4</sub> & 1 M KOH | 167 & 217 @ 10 mA/cm <sup>2</sup>   | 63 & 64                                     | -                                    | 47               |

|                                    |                                                 |                                  |         |                       |    |
|------------------------------------|-------------------------------------------------|----------------------------------|---------|-----------------------|----|
| Mo <sub>2</sub> C/CNT-graphene     | 0.5 M H <sub>2</sub> SO <sub>4</sub>            | 130@ 10 mA/cm <sup>2</sup>       | 58      | 6.20×10 <sup>-2</sup> | 48 |
| MoC <sub>x</sub> nano- octahedrons | 0.5 M H <sub>2</sub> SO <sub>4</sub> and 1M KOH | 142 & 151@ 10 mA/cm <sup>2</sup> | 53 & 59 | 0.023 & 0.029         | 49 |

## References

1. T. Sun, Z. Li, X. Liu, L. Ma, J. Wang and S. Yang, Facile construction of 3D graphene/MoS<sub>2</sub> composites as advanced electrode materials for supercapacitors, *J. Power Sources*, 2016, **331**, 180-188.
2. S. Hussain, I. Rabani, D. Vikraman, A. Feroze, M. Ali, Y.-S. Seo, W. Song, K.-S. An, H.-S. Kim and S.-H. Chun, MoS<sub>2</sub>@ X<sub>2</sub>C (X= Mo or W) hybrids for enhanced supercapacitor and hydrogen evolution performances, *Chemical Engineering Journal*, 2021, **421**, 127843.
3. S. Ratha and C. S. Rout, Supercapacitor electrodes based on layered tungsten disulfide-reduced graphene oxide hybrids synthesized by a facile hydrothermal method, *ACS applied materials & interfaces*, 2013, **5**, 11427-11433.
4. S. Hussain, D. Vikraman, Z. A. Sheikh, M. T. Mehran, F. Shahzad, K. M. Batoo, H.-S. Kim, D.-K. Kim, M. Ali and J. Jung, WS<sub>2</sub>-embedded MXene/GO hybrid nanosheets as electrodes for asymmetric supercapacitors and hydrogen evolution reactions, *Chemical Engineering Journal*, 2023, **452**, 139523.
5. K. Singh, S. Kumar, K. Agarwal, K. Soni, V. R. Gedela and K. Ghosh, Three-dimensional Graphene with MoS<sub>2</sub> Nanohybrid as Potential Energy Storage/Transfer Device, *Scientific reports*, 2017, **7**, 9458.
6. D. Vikraman, S. Hussain, K. Karuppasamy, A. Feroze, A. Kathalingam, A. Sanmugam, S.-H. Chun, J. Jung and H.-S. Kim, Engineering the novel MoSe<sub>2</sub>-Mo<sub>2</sub>C hybrid nanoarray electrodes for energy storage and water splitting applications, *Applied Catalysis B: Environmental*, 2020, **264**, 118531.
7. K. J. Samdani, D. W. Joh and K. T. Lee, Molybdenum carbide nanoparticle-decorated 3D nitrogen-doped carbon flowers as an efficient electrode for high-performance, all-solid-state symmetric supercapacitors, *J. Alloys Compd.*, 2018, **748**, 134-144.

8. H. Li, X. Chen, E. Zalnezhad, K. Hui, K. Hui and M. J. Ko, 3D hierarchical transition-metal sulfides deposited on MXene as binder-free electrode for high-performance supercapacitors, *Journal of Industrial and Engineering Chemistry*, 2020, **82**, 309-316.
9. T. N. Khawula, K. Raju, P. J. Franklyn, I. Sigalas and K. I. Ozoemena, Symmetric pseudocapacitors based on molybdenum disulfide (MoS<sub>2</sub>)-modified carbon nanospheres: correlating physicochemistry and synergistic interaction on energy storage, *Journal of Materials Chemistry A*, 2016, **4**, 6411-6425.
10. B. Kirubasankar, M. Narayanasamy, J. Yang, M. Han, W. Zhu, Y. Su, S. Angaiah and C. Yan, Construction of heterogeneous 2D layered MoS<sub>2</sub>/MXene nanohybrid anode material via interstratification process and its synergetic effect for asymmetric supercapacitors, *Applied Surface Science*, 2020, **534**, 147644.
11. K.-J. Huang, L. Wang, J.-Z. Zhang, L.-L. Wang and Y.-P. Mo, One-step preparation of layered molybdenum disulfide/multi-walled carbon nanotube composites for enhanced performance supercapacitor, *Energy*, 2014, **67**, 234-240.
12. J. Shen, P. Dong, R. Baines, X. Xu, Z. Zhang, P. M. Ajayan and M. Ye, Controlled synthesis and comparison of NiCo<sub>2</sub>S<sub>4</sub>/graphene/2D TMD ternary nanocomposites for high-performance supercapacitors, *Chemical Communications*, 2016, **52**, 9251-9254.
13. D. Vikraman, K. Karuppasamy, S. Hussain, A. Kathalingam, A. Sanmugam, J. Jung and H. S. Kim, One-pot facile methodology to synthesize MoS<sub>2</sub>-graphene hybrid nanocomposites for supercapacitors with improved electrochemical capacitance, *Compos. Part B-Eng.*, 2019, **161**, 555-563.
14. S. Hussain, I. Rabani, D. Vikraman, T. Mehran, F. Shahzad, Y. S. Seo, H. S. Kim and J. Jung, Designing the MXene/molybdenum diselenide hybrid nanostructures for high-performance symmetric supercapacitor and hydrogen evolution applications, *International Journal of Energy Research*, 2021, **45**, 18770-18785.
15. Z. Pan, F. Cao, X. Hu and X. Ji, A facile method for synthesizing CuS decorated Ti<sub>3</sub>C<sub>2</sub> MXene with enhanced performance for asymmetric supercapacitors, *Journal of Materials Chemistry A*, 2019, **7**, 8984-8992.

16. X. Wang, H. Li, H. Li, S. Lin, W. Ding, X. Zhu, Z. Sheng, H. Wang, X. Zhu and Y. Sun, 2D/2D 1T-MoS<sub>2</sub>/Ti<sub>3</sub>C<sub>2</sub> MXene Heterostructure with Excellent Supercapacitor Performance, *Advanced Functional Materials*, 2020, **30**, 0190302.
17. Y. Li, K. Donatien-Pascal and X. Jin, In situ growth of Chrysanthemum-like NiCo<sub>2</sub>S<sub>4</sub> on MXene for High-performance Supercapacitors and Non-enzymatic H<sub>2</sub>O<sub>2</sub> Sensor, *Dalton Transactions*, 2020.
18. A. Sharma, P. Mane, B. Chakraborty and C. S. Rout, 1T-VS<sub>2</sub>/MXene Hybrid as a Superior Electrode Material for Asymmetric Supercapacitors: Experimental and Theoretical Investigations, *ACS Applied Energy Materials*, 2021, **4**, 14198-14209.
19. Y. A. Dakka, J. Balamurugan, R. Balaji, N. H. Kim and J. H. Lee, Advanced Cu<sub>0.5</sub>Co<sub>0.5</sub>Se<sub>2</sub> nanosheets and MXene electrodes for high-performance asymmetric supercapacitors, *Chemical Engineering Journal*, 2020, **385**, 123455.
20. L. Zhang, G. Yang, Z. Chen, D. Liu, J. Wang, Y. Qian, C. Chen, Y. Liu, L. Wang and J. Razal, MXene coupled with molybdenum dioxide nanoparticles as 2D-0D pseudocapacitive electrode for high performance flexible asymmetric micro-supercapacitors, *Journal of Materiomics*, 2020, **6**, 138-144.
21. Y. Wang, J. Sun, X. Qian, Y. Zhang, L. Yu, R. Niu, H. Zhao and J. Zhu, 2D/2D heterostructures of nickel molybdate and MXene with strong coupled synergistic effect towards enhanced supercapacitor performance, *Journal of Power Sources*, 2019, **414**, 540-546.
22. R. Zhao, M. Wang, D. Zhao, H. Li, C. Wang and L. Yin, Molecular-level heterostructures assembled from titanium carbide MXene and Ni-Co-Al layered double-hydroxide nanosheets for all-solid-state flexible asymmetric high-energy supercapacitors, *ACS Energy Letters*, 2017, **3**, 132-140.
23. Y. Luo, Y. Tian, Y. Tang, X. Yin and W. Que, 2D hierarchical nickel cobalt sulfides coupled with ultrathin titanium carbide (MXene) nanosheets for hybrid supercapacitors, *Journal of Power Sources*, **482**, 228961.
24. L. Zhang and S. W. Or, Self-assembled three-dimensional macroscopic graphene/MXene-based hydrogel as electrode for supercapacitor, *APL Materials*, 2020, **8**, 091101.

25. J. Zheng, X. Pan, X. Huang, D. Xiong, Y. Shang, X. Li, N. Wang, W.-M. Lau and H. Y. Yang, Integrated MXene-based Aerogel Composite: Componential and Structural Engineering towards Enhanced Performance Stability of Hybrid Supercapacitor, *Chemical Engineering Journal*, 2020, 125197.
26. X. Chen, J. Zhu, J. Cai, Y. Zhang and X. Wang, Nanosheets assembled layered MXene/MoSe<sub>2</sub> nanohybrid positive electrode materials for high-performance asymmetric supercapacitors, *Journal of Energy Storage*, 2021, **40**, 102721.
27. S. Venkateshalu, J. Cherusseri, M. Karnan, K. S. Kumar, P. Kollu, M. Sathish, J. Thomas, S. K. Jeong and A. N. Grace, New Method for the Synthesis of 2D Vanadium Nitride (MXene) and Its Application as a Supercapacitor Electrode, *ACS omega*, 2020, **5**, 17983-17992.
28. W. Wang, D. Jiang, X. Chen, K. Xie, Y. Jiang and Y. Wang, A sandwich-like nano-micro LDH-MXene-LDH for high-performance supercapacitors, *Applied Surface Science*, 2020, 145982.
29. Y. Luo, C. Yang, Y. Tian, Y. Tang, X. Yin and W. Que, A long cycle life asymmetric supercapacitor based on advanced nickel-sulfide/titanium carbide (MXene) nanohybrid and MXene electrodes, *Journal of Power Sources*, 2020, **450**, 227694.
30. X. He, T. Bi, X. Zheng, W. Zhu and J. Jiang, Nickel cobalt sulfide nanoparticles grown on titanium carbide MXenes for high-performance supercapacitor, *Electrochimica Acta*, 2020, **332**, 135514.
31. K. Ojha, S. Saha, H. Kolev, B. Kumar and A. K. Ganguli, Composites of graphene-Mo<sub>2</sub>C rods: highly active and stable electrocatalyst for hydrogen evolution reaction, *Electrochimica Acta*, 2016, **193**, 268-274.
32. L. Zhang, T. Wang, L. Sun, Y. Sun, T. Hu, K. Xu and F. Ma, Hydrothermal synthesis of 3D hierarchical MoSe<sub>2</sub>/NiSe<sub>2</sub> composite nanowires on carbon fiber paper and their enhanced electrocatalytic activity for the hydrogen evolution reaction, *J. Mater. Chem. A*, 2017, **5**, 19752-19759.
33. Y. Liu, B. Huang and Z. Xie, Hydrothermal synthesis of core-shell MoO<sub>2</sub>/α-Mo<sub>2</sub>C heterojunction as high performance electrocatalyst for hydrogen evolution reaction, *Applied Surface Science*, 2018, **427**, 693-701.

34. D. Wang, J. Wang, X. Luo, Z. Wu and L. Ye, In situ preparation of Mo<sub>2</sub>C nanoparticles embedded in ketjenblack carbon as highly efficient electrocatalysts for hydrogen evolution, *ACS Sustainable Chemistry & Engineering*, 2017, **6**, 983-990.
35. Y. Li, X. Wu, H. Zhang and J. Zhang, Interface Designing over WS<sub>2</sub>/W<sub>2</sub>C for Enhanced Hydrogen Evolution Catalysis, *ACS Applied Energy Materials*, 2018, **1**, 3377-3384.
36. X. Ren, Q. Wei, P. Ren, Y. Wang and R. Chen, Synthesis of flower-like MoSe<sub>2</sub>@MoS<sub>2</sub> nanocomposites as the high efficient water splitting electrocatalyst, *Mater. Lett.*, 2018, **231**, 213-216.
37. M. Qamar, A. Adam, B. Merzougui, A. Helal, O. Abdulhamid and M. Siddiqui, Metal-organic framework-guided growth of Mo<sub>2</sub>C embedded in mesoporous carbon as a high-performance and stable electrocatalyst for the hydrogen evolution reaction, *Journal of Materials Chemistry A*, 2016, **4**, 16225-16232.
38. K. Zhang, Y. Zhao, D. Fu and Y. Chen, Molybdenum carbide nanocrystal embedded N-doped carbon nanotubes as electrocatalysts for hydrogen generation, *Journal of Materials Chemistry A*, 2015, **3**, 5783-5788.
39. H. Lin, Z. Shi, S. He, X. Yu, S. Wang, Q. Gao and Y. Tang, Heteronanowires of MoC-Mo<sub>2</sub>C as efficient electrocatalysts for hydrogen evolution reaction, *Chemical science*, 2016, **7**, 3399-3405.
40. G. Zhao, P. Li, K. Rui, Y. Chen, S. X. Dou and W. Sun, CoSe<sub>2</sub>/MoSe<sub>2</sub> Heterostructures with Enriched Water Adsorption/Dissociation Sites towards Enhanced Alkaline Hydrogen Evolution Reaction, *Chem. Eur. J.*, 2018, **24**, 11158-11165.
41. W.-F. Chen, C.-H. Wang, K. Sasaki, N. Marinkovic, W. Xu, J. Muckerman, Y. Zhu and R. Adzic, Highly active and durable nanostructured molybdenum carbide electrocatalysts for hydrogen production, *Energy & Environmental Science*, 2013, **6**, 943-951.
42. J. Yang, C. Wang, H. Ju, Y. Sun, S. Xing, J. Zhu and Q. Yang, Integrated Quasiplane Heteronanostructures of MoSe<sub>2</sub>/Bi<sub>2</sub>Se<sub>3</sub> Hexagonal Nanosheets: Synergetic Electrocatalytic Water Splitting and Enhanced Supercapacitor Performance, *Adv. Funct. Mater.*, 2017, **27**, 1703864.
43. L.-N. Zhang, S.-H. Li, H.-Q. Tan, S. U. Khan, Y.-Y. Ma, H.-Y. Zang, Y.-H. Wang and Y.-G. Li, MoP/Mo<sub>2</sub>C@C: a new combination of electrocatalysts for highly efficient hydrogen

- evolution over the entire pH range, *ACS applied materials & interfaces*, 2017, **9**, 16270-16279.
44. Q. Gong, L. Cheng, C. Liu, M. Zhang, Q. Feng, H. Ye, M. Zeng, L. Xie, Z. Liu and Y. Li, Ultrathin MoS<sub>2</sub> (1-x) Se<sub>2</sub> x alloy nanoflakes for electrocatalytic hydrogen evolution reaction, *Acs Catalysis*, 2015, **5**, 2213-2219.
  45. B. Konkena, J. Masa, W. Xia, M. Muhler and W. Schuhmann, MoSSe@ reduced graphene oxide nanocomposite heterostructures as efficient and stable electrocatalysts for the hydrogen evolution reaction, *Nano Energy*, 2016, **29**, 46-53.
  46. H. Wang, C. Sun, Y. Cao, J. Zhu, Y. Chen, J. Guo, J. Zhao, Y. Sun and G. Zou, Molybdenum carbide nanoparticles embedded in nitrogen-doped porous carbon nanofibers as a dual catalyst for hydrogen evolution and oxygen reduction reactions, *Carbon*, 2017, **114**, 628-634.
  47. W. Gao, Y. Shi, Y. Zhang, L. Zuo, H. Lu, Y. Huang, W. Fan and T. Liu, Molybdenum carbide anchored on graphene nanoribbons as highly efficient all-pH hydrogen evolution reaction electrocatalyst, *ACS Sustainable Chemistry & Engineering*, 2016, **4**, 6313-6321.
  48. D. H. Youn, S. Han, J. Y. Kim, J. Y. Kim, H. Park, S. H. Choi and J. S. Lee, Highly active and stable hydrogen evolution electrocatalysts based on molybdenum compounds on carbon nanotube-graphene hybrid support, *ACS nano*, 2014, **8**, 5164-5173.
  49. H. B. Wu, B. Y. Xia, L. Yu, X.-Y. Yu and X. W. D. Lou, Porous molybdenum carbide nano-octahedrons synthesized via confined carburization in metal-organic frameworks for efficient hydrogen production, *Nature communications*, 2015, **6**, 6512.
